# Supplementary material
Source: PubMed Central journal article supplement (PMC5007557)

# Joshi et al, Source Data For Figure 2 Blots

## Figure 2A, Blot for Ubiquitin

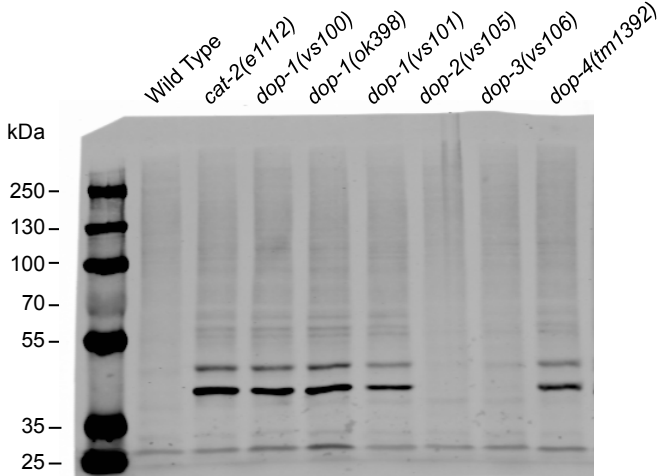

# Joshi et al, Source Data For Figure 2 Blots

## Figure 2A, Blot for GFP

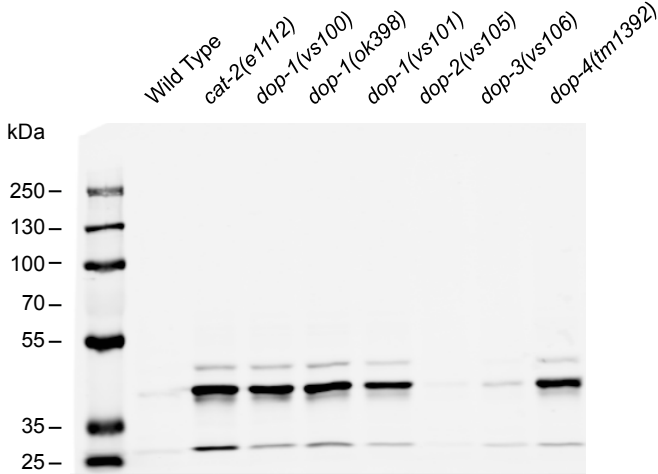

# Joshi et al, Source Data For Figure 2 Blots

## Figure 2A, Blot for RPN-11 & p38 MAPK

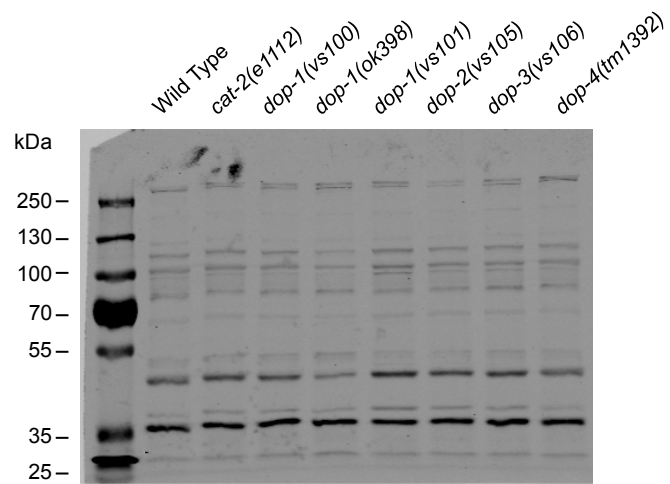

# Joshi et al, Source Data For Figure 2 Blots

## Figure 2A, Blot for 20S Proteasome

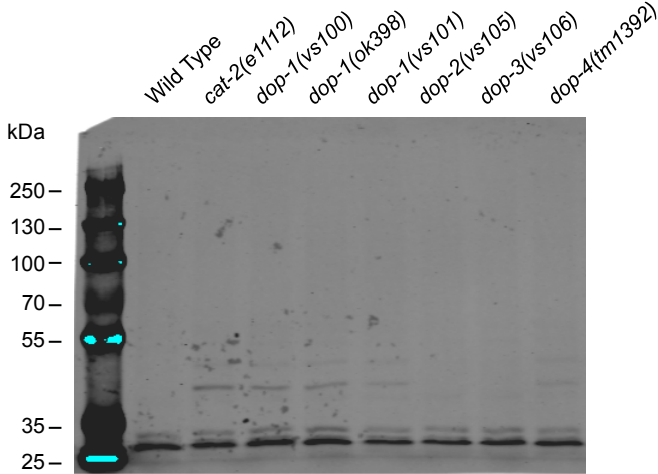

# Joshi et al, Source Data For Figure 2 Blots

## Figure 2A, Blot for Actin

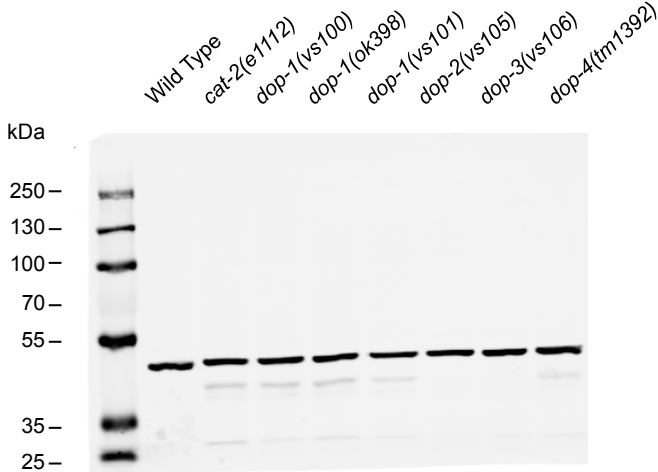

# Joshi et al, Source Data For Figure 2 Blots

## Figure 2B, Blot for Ubiquitin

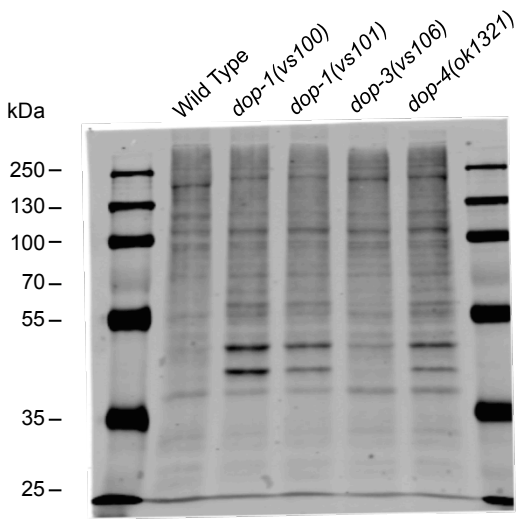

# Joshi et al, Source Data For Figure 2 Blots

## Figure 2B, Blot for GFP

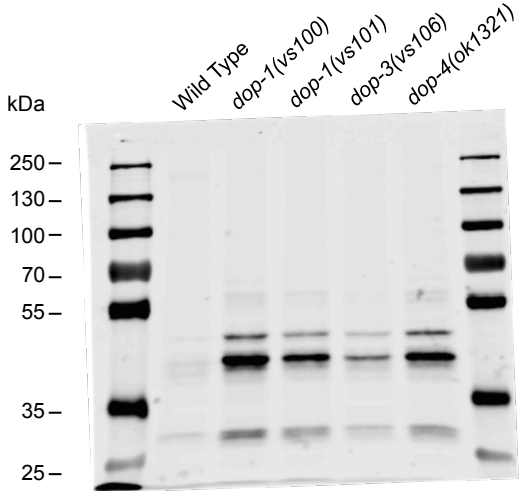

# Joshi et al, Source Data For Figure 2 Blots

## Figure 2B, Blot for RPN-11 & p38 MAPK

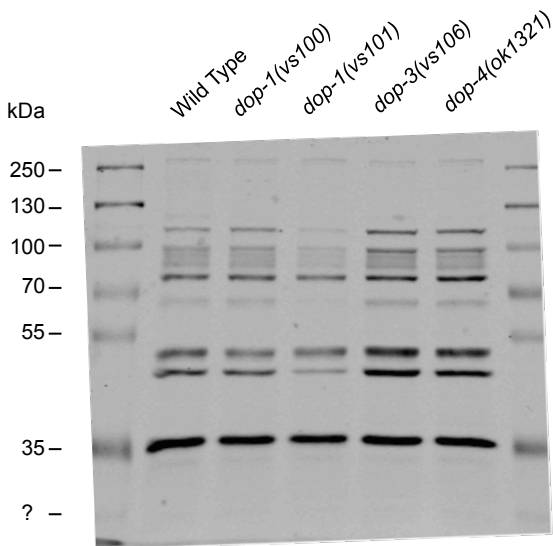



# Joshi et al, Source Data For Figure 2 Blots

## Figure 2B, Blot for 20S Proteasome

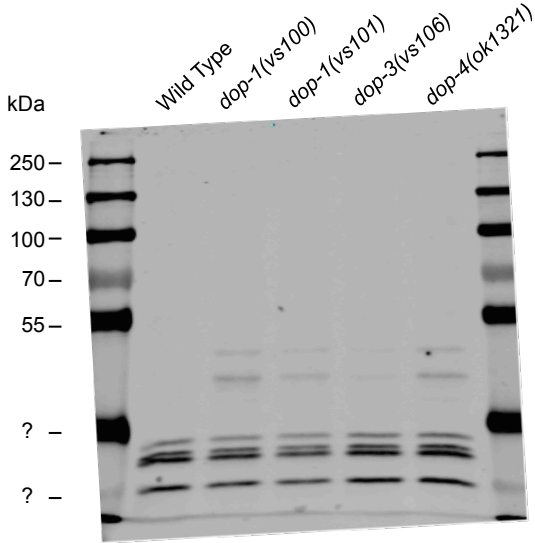

# Joshi et al, Source Data For Figure 2 Blots

## Figure 2B, Blot for Actin

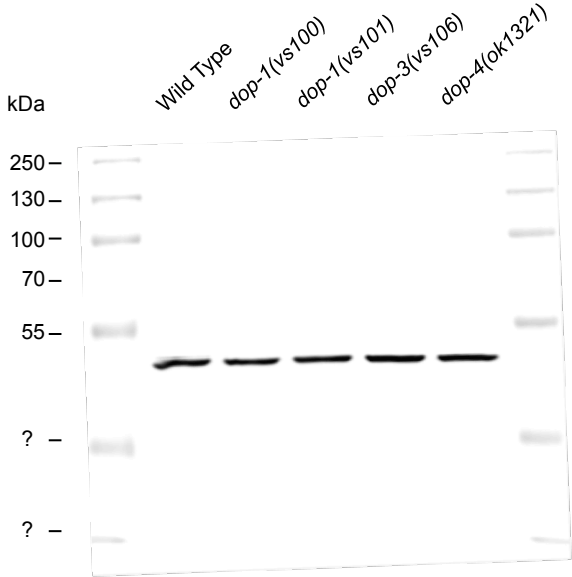

Supplement: EMBJ-35-1885-s002.pdf [file EMBJ-35-1885-s002.pdf]
